# Supplementary material
Source: PubMed Central journal article supplement (PMC7147485)
Supplement: NIHMS1571478-supplement-Supplementary_Material.pdf [file NIHMS1571478-supplement-Supplementary_Material.pdf]

## **The language network in autism:**

### **Atypical functional connectivity with default mode and visual regions**

Gao Y, Linke A, Jao Keehn RJ, Punyamurthula S, Jahedi A, Gates K, Fishman I, & Müller R-A.

### **Supplemental Materials**

## Supplementary Figure 1. Regions of interest

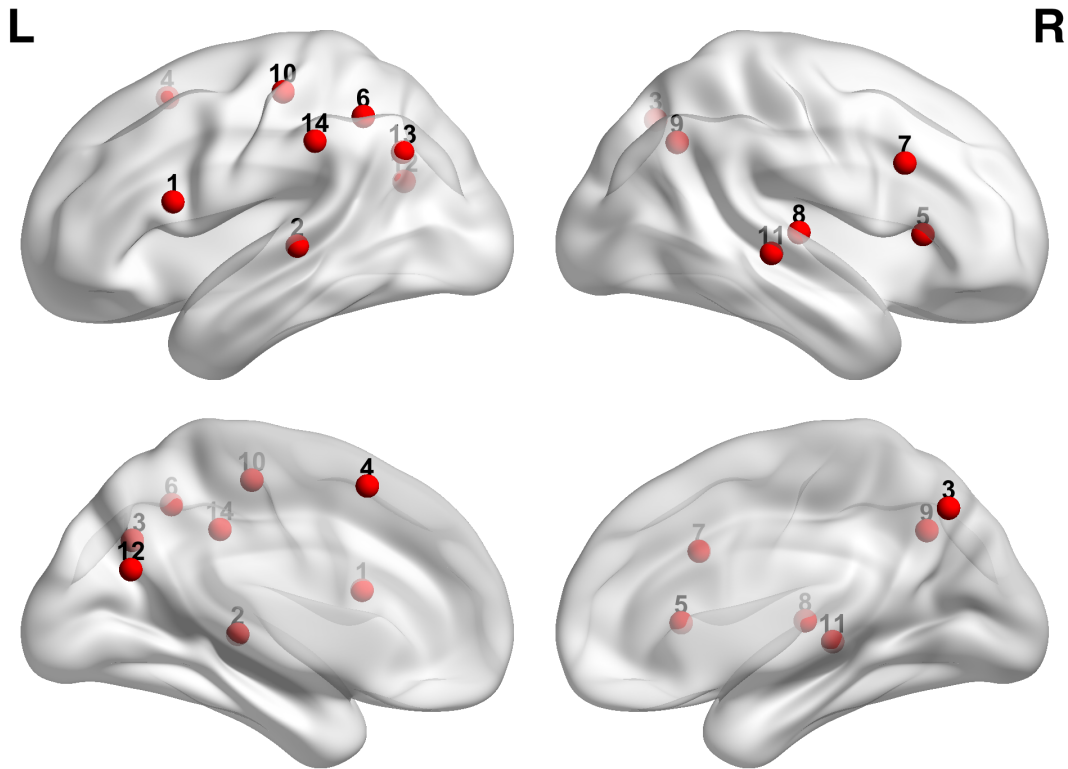

Regions of interest extracted from statistical maps from ALE study of language comprehension (Rodd et al., 2015). 1. Left inferior frontal gyrus; 2. Left superior temporal sulcus; 3. Bilateral dorsal precuneus; 4. Bilateral supplementary motor area; 5. Right insula; 6. Left inferior parietal lobule; 7. Right inferior frontal sulcus; 8. Right Heschl's gyrus; 9. Right inferior parietal lobule; 10. Left pericentral region; 11. Right superior temporal sulcus; 12. Left precuneus/posterior cingulate cortex; 13. Left angular gyrus; 14. Left supramarginal gyrus

**Supplementary Figure 2. GIMME models of PCC mediated iFC between Broca's area and visual cortex**

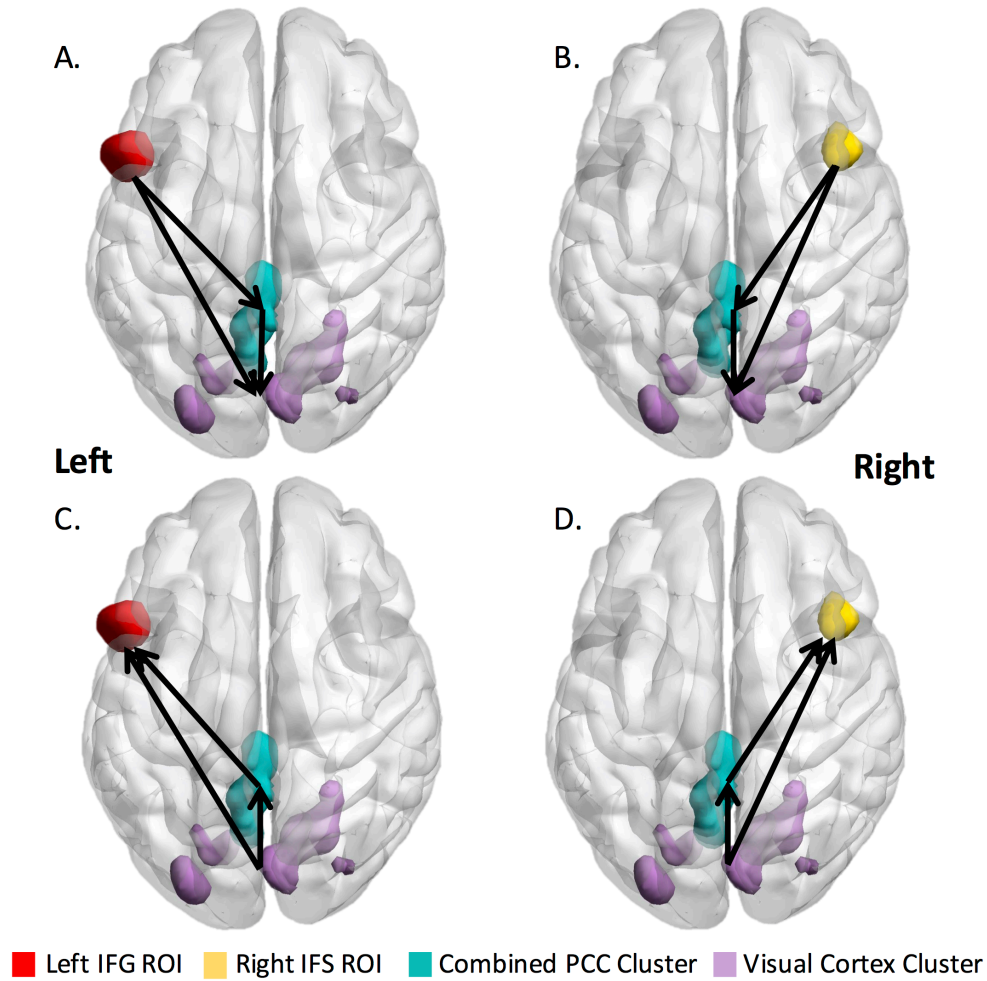

GIMME models that show posterior cingulate cortex (PCC) mediation of iFC between inferior frontal ROIs and the between-group results clusters in visual cortex from PCC ROI. Left inferior frontal gyrus (IFG) ROI is shown in red, right inferior frontal sulcus (IFS) ROI in yellow, combined PCC/Precuneus ROI and group-effects cluster from bilateral inferior frontal ROIs in blue, and visual cortex group-effects clusters in purple. Of 54 ASD subjects, 24 showed significant mediation effects from the PCC to connectivity between bilateral frontal language areas and visual cortex. **(A)** 4 participants showed significant mediation of iFC from left IFG to visual cortex by PCC. **(B)** 7 subjects showed significant PCC mediation of iFC from right

IFS to visual cortex. **(C)** 2 subjects showed significant PCC mediation of iFC from visual cortex to left IFG.  
**(D)** 11 subjects had significant PCC mediation of connectivity from visual cortex to right IFS.

**Supplementary Figure 3. Between group differences in language network iFC across preprocessing pipelines**

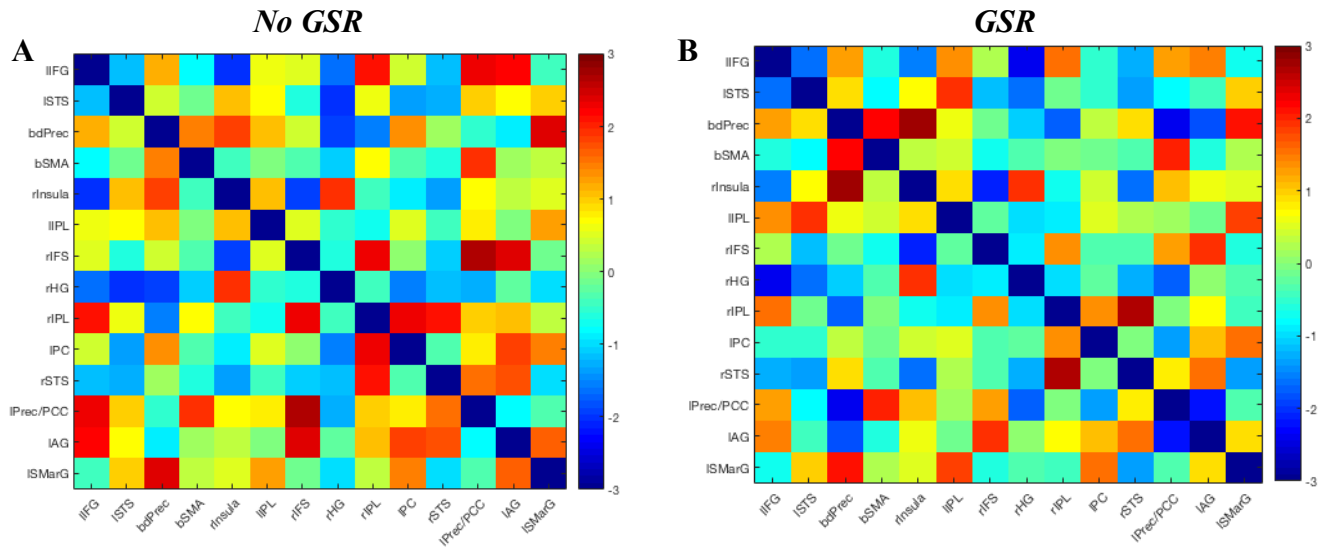

Between group differences for within language network iFC analysis illustrated with T-values. Separate preprocessing pipelines include **(A)** Original pipeline without global signal regression (GSR); **(B)** Pipeline with GSR. IIFG: left inferior frontal gyrus; ISTS: left superior temporal sulcus; bdPrec: bilateral dorsal precuneus; bSMA: bilateral supplementary motor area; rInsula: right insula; lIPL: left inferior parietal lobule; rIFS: right inferior frontal sulcus; rHG: right Heschl's gyrus; rIPL: right inferior parietal lobule; IPC: left pericentral region; rSTS: right superior temporal sulcus; lIPrec/PCC: left precuneus/posterior cingulate cortex; lIAG: left angular gyrus; lISMarG: left supramarginal gyrus.

**Supplementary Table 1. Significant between-group clusters from whole-brain iFC analysis**

| Seed      | Anatomical location                  | Cluster-Wise $\alpha$ | Cohen's $d$ | Voxels | CM x | CM y | CM z |
|-----------|--------------------------------------|-----------------------|-------------|--------|------|------|------|
| IIFG      | Bilateral posterior cingulate cortex | < 0.03                | 0.84        | 35     | -4   | -51  | 35   |
| rIFS      | Bilateral posterior cingulate cortex | < 0.01                | 0.68        | 68     | 0    | -38  | 32   |
|           | Bilateral posterior cingulate cortex | < 0.03                | 0.89        | 33     | -3   | -55  | 14   |
| IPrec/PCC | Right lingual gyrus                  | < 0.01                | 0.82        | 280    | 15   | -71  | 0    |
|           | Left middle occipital gyrus          | < 0.01                | 0.83        | 73     | -27  | -84  | 24   |
|           | Left lingual gyrus                   | < 0.01                | 0.68        | 54     | -18  | -70  | -10  |
|           | Right middle occipital gyrus         | < 0.04                | 0.65        | 29     | 32   | -78  | 27   |

Between group differences for whole-brain iFC analysis for the following ROIs: left inferior frontal gyrus (IIFG), right inferior frontal sulcus (rIFS), left precuneus/posterior cingulate cortex (IPrec/PCC). All resulting clusters exhibited increased connectivity with ROI in the ASD group relative to the TD group. Results were cluster-corrected for multiple comparisons using AFNI's 3dttest++ -ClustSim permutation tests with voxel-level  $p$ -threshold of 0.001; individual cluster-wise  $\alpha$  are listed separately. All coordinates reflect center of mass (CM) of resulting cluster.

**Supplementary Table 2. Subgroup information**

|                     | PCC Mediation Group<br>(n = 24) |             | No Mediation Group<br>(n =28) |             | T, p-value      |
|---------------------|---------------------------------|-------------|-------------------------------|-------------|-----------------|
|                     | Mean (SD)                       | Range       | Mean (SD)                     | Range       |                 |
| <b>Gender</b>       | 7 female                        |             | 1 female                      |             |                 |
| <b>Handedness</b>   | 2 left                          |             | 5 left                        |             |                 |
| <b>Age in years</b> | 13.4 (2.4)                      | 9.2-18.0    | 14.0 (2.8)                    | 9.2-17.8    | -0.81, $p=0.42$ |
| <b>Head Motion</b>  |                                 |             |                               |             |                 |
| Pre-censoring RMSD  | 0.070 (0.034)                   | 0.021-0.148 | 0.065 (0.030)                 | 0.019-0.140 | 0.58, $p=0.56$  |
| Denoised RMSD       | 0.003 (0.002)                   | 0.001-0.007 | 0.003 (0.002)                 | 0.001-0.008 | -0.68, $p=0.50$ |
| TP Post-Censoring   | 177 (5.1)                       | 158-189     | 178 (3.1)                     | 169-180     | -0.62, $p=0.54$ |
| <b>WASI</b>         |                                 |             |                               |             |                 |
| Verbal IQ           | 103 (18.9)                      | 70-147      | 101 (15.7)                    | 73-131      | 0.35, $p=0.73$  |
| Nonverbal IQ        | 106 (20.6)                      | 53-140      | 106 (14.0)                    | 70-136      | 0.12, $p=0.90$  |
| Full-scale IQ       | 105 (20.2)                      | 66-141      | 104 (12.8)                    | 79-126      | 0.16, $p=0.88$  |
| <b>CELF-4*</b>      |                                 |             |                               |             |                 |
| Core Language       | 96 (20.6)                       | 56-120      | 102 (14.9)                    | 60-120      | -1.13, $p=0.27$ |
| Receptive           | 96 (17.4)                       | 64-131      | 101 (15.2)                    | 60-119      | -0.87, $p=0.39$ |
| Expressive          | 93 (19.7)                       | 55-120      | 99 (15.0)                     | 63-118      | -1.04, $p=0.30$ |
| <b>ADOS-2</b>       |                                 |             |                               |             |                 |
| Social Affect       | 9.6 (4.2)                       | 5-20        | 10.9 (3.4)                    | 5-16        | -1.16, $p=0.25$ |
| Repetitive Behavior | 2.8 (1.7)                       | 0-5         | 3.6 (1.9)                     | 1-8         | -1.43, $p=0.16$ |
| Total               | 12.3 (4.9)                      | 7-24        | 14.5 (4.2)                    | 6-21        | -1.55, $p=0.13$ |
| Severity            | 7.0 (2.0)                       | 4-10        | 7.9 (1.9)                     | 3-10        | -1.42, $p=0.16$ |
| <b>ADI-R</b>        |                                 |             |                               |             |                 |
| Social Interaction  | 18.3 (5.1)                      | 7-28        | 18.5 (4.8)                    | 11-28       | -0.11, $p=0.91$ |
| Communication       | 14.3 (5.9)                      | 2-24        | 12.4 (4.2)                    | 4-22        | 1.56, $p=0.13$  |
| Repetitive Behavior | 6.9 (2.4)                       | 2-12        | 5.5 (2.0)                     | 1-9         | 2.16, $p=0.04$  |

\* CELF-4 scores were only available for 17 participants in the PCC Mediation Group and 24 participants in the No Mediation Group.

**Supplementary Table 3. Correlations between language network iFC and ASD symptom severity**

| ROI Pairs         | Autism Symptom Ratings |                 |                 |                   |                 |                 |                              |                 |                 |            |                 |                 |
|-------------------|------------------------|-----------------|-----------------|-------------------|-----------------|-----------------|------------------------------|-----------------|-----------------|------------|-----------------|-----------------|
|                   | ADI Social             |                 |                 | ADI Communication |                 |                 | ADOS<br>Social Communication |                 |                 | ADOS Total |                 |                 |
|                   | r                      | <i>p</i> -value | <i>q</i> -value | r                 | <i>p</i> -value | <i>q</i> -value | r                            | <i>p</i> -value | <i>q</i> -value | r          | <i>p</i> -value | <i>q</i> -value |
| IIFG - lPrec/PCC  | -0.150                 | 0.305           | 0.611           | -0.123            | 0.400           | 0.615           | -0.104                       | 0.477           | 0.668           | -0.026     | 0.858           | 0.924           |
| <i>IIFG - lAG</i> | -0.119                 | 0.417           | 0.615           | -0.018            | 0.902           | 0.936           | <i>-0.317</i>                | <i>0.026</i>    | <i>0.247</i>    | -0.264     | 0.064           | 0.415           |
| bdPrec - lSMarG   | -0.045                 | 0.759           | 0.885           | 0.143             | 0.326           | 0.611           | -0.257                       | 0.074           | 0.415           | -0.242     | 0.090           | 0.420           |
| rIFS - rIPL       | -0.217                 | 0.134           | 0.537           | -0.157            | 0.281           | 0.611           | -0.063                       | 0.668           | 0.813           | -0.120     | 0.406           | 0.615           |
| rIFS - lPrec/PCC  | -0.196                 | 0.177           | 0.611           | -0.157            | 0.281           | 0.611           | -0.091                       | 0.535           | 0.681           | -0.141     | 0.327           | 0.611           |
| rIFS - lAG        | -0.180                 | 0.215           | 0.611           | -0.119            | 0.414           | 0.615           | -0.098                       | 0.503           | 0.671           | -0.173     | 0.229           | 0.611           |
| <b>rIPL - IPC</b> | <b>-0.507</b>          | <b>0.000</b>    | <b>0.006</b>    | <i>-0.370</i>     | <i>0.009</i>    | <i>0.124</i>    | -0.003                       | 0.986           | 0.986           | 0.032      | 0.824           | 0.923           |

The relationship between language ROI pairs and ASD symptom severity as measured by the ADOS and ADI-R subscale scores. The results were corrected for effects of age and in-scanner head motion. The significance of each Pearson correlations is shown in uncorrected *p*-values and FDR-adjusted *q*-values. Results that survived FDR correction ( $q < 0.05$ ) are bolded, and results that became non-significant after FDR correction ( $q > 0.05$ ) are italicized. IIFG: left inferior frontal gyrus; IPC: left pericentral region; lPrec/PCC: left precuneus/posterior cingulate cortex; lAG: left angular gyrus; lSMarG: left supramarginal gyrus; bdPrec: bilateral dorsal precuneus; rIFS: right inferior frontal sulcus; rIPL: right inferior parietal lobule.



**Supplementary Table 4. Correlations between language network iFC and language scores**

| ROI Pairs |                  | CELF-4*       |                 |                    |                 |                     |                 |
|-----------|------------------|---------------|-----------------|--------------------|-----------------|---------------------|-----------------|
|           |                  | Core Language |                 | Receptive Language |                 | Expressive Language |                 |
|           |                  | r             | <i>p</i> -value | r                  | <i>p</i> -value | r                   | <i>p</i> -value |
| ASD Group | IIFG - lPrec/PCC | -0.025        | 0.880           | -0.245             | 0.133           | -0.002              | 0.993           |
|           | IIFG - lAG       | -0.068        | 0.682           | -0.190             | 0.247           | -0.031              | 0.852           |
|           | bdPrec - lSMarG  | -0.068        | 0.682           | 0.058              | 0.727           | -0.069              | 0.675           |
|           | rIFS - rIPL      | -0.135        | 0.414           | 0.066              | 0.689           | -0.146              | 0.374           |
|           | rIFS - lPrec/PCC | 0.093         | 0.573           | 0.086              | 0.603           | 0.087               | 0.599           |
|           | rIFS - lAG       | -0.184        | 0.261           | -0.010             | 0.950           | -0.171              | 0.299           |
|           | rIPL - lPC       | 0.163         | 0.321           | 0.169              | 0.303           | 0.112               | 0.498           |
| TD Group  | IIFG - lPrec/PCC | 0.015         | 0.932           | 0.376              | 0.024           | -0.015              | 0.932           |
|           | IIFG - lAG       | -0.002        | 0.990           | 0.227              | 0.183           | 0.013               | 0.940           |
|           | bdPrec - lSMarG  | -0.040        | 0.815           | -0.131             | 0.448           | -0.105              | 0.541           |
|           | rIFS - rIPL      | 0.097         | 0.575           | 0.068              | 0.692           | 0.086               | 0.616           |
|           | rIFS - lPrec/PCC | 0.163         | 0.343           | 0.127              | 0.461           | 0.171               | 0.319           |
|           | rIFS - lAG       | 0.108         | 0.530           | 0.164              | 0.339           | 0.104               | 0.548           |
|           | rIPL - lPC       | -0.081        | 0.638           | -0.106             | 0.539           | -0.107              | 0.536           |

The relationship between language ROI pairs and functional language abilities as measured by CELF-4 subscale scores. The results were corrected for effects of age and in-scanner head motion. Results were not corrected for multiple correction. \* CELF-4 scores were only available for 41 ASD and 38 TD participants. IIFG: left inferior frontal gyrus; lPC: left pericentral region; lPrec/PCC: left precuneus/posterior cingulate cortex; lAG: left angular gyrus; lSMarG: left supramarginal gyrus; bdPrec: bilateral dorsal precuneus; rIFS: right inferior frontal sulcus; rIPL: right inferior parietal lobule.

**Supplementary Table 5. Correlations between language network iFC results and language measures**

| iFC Regions                |                         | CELF-4*       |                 |                 |                    |                 |                 |                     |                 |                 |
|----------------------------|-------------------------|---------------|-----------------|-----------------|--------------------|-----------------|-----------------|---------------------|-----------------|-----------------|
|                            |                         | Core Language |                 |                 | Receptive Language |                 |                 | Expressive Language |                 |                 |
|                            |                         | r             | <i>p</i> -value | <i>q</i> -value | r                  | <i>p</i> -value | <i>q</i> -value | r                   | <i>p</i> -value | <i>q</i> -value |
| PCC Mediation<br>ASD Group | IIFG - PCC              | -0.284        | 0.306           | 0.550           | -0.247             | 0.374           | 0.594           | -0.259              | 0.352           | 0.593           |
|                            | rIFS - PCC              | -0.355        | 0.194           | 0.389           | -0.370             | 0.174           | 0.362           | -0.337              | 0.219           | 0.422           |
|                            | <i>lPrec/PCC - rLG</i>  | <i>-0.641</i> | <i>0.010</i>    | <i>0.067</i>    | <b>-0.740</b>      | <b>0.002</b>    | <b>0.022</b>    | <i>-0.647</i>       | <i>0.009</i>    | <i>0.067</i>    |
|                            | lPrec/PCC - IMOG        | -0.374        | 0.169           | 0.362           | -0.547             | 0.035           | 0.129           | -0.393              | 0.147           | 0.330           |
|                            | <i>lPrec/PCC - ILG</i>  | <i>-0.597</i> | <i>0.019</i>    | <i>0.092</i>    | <i>-0.661</i>      | <i>0.007</i>    | <i>0.067</i>    | <i>-0.615</i>       | <i>0.015</i>    | <i>0.088</i>    |
|                            | lPrec/PCC - rMOG        | -0.525        | 0.044           | 0.149           | -0.660             | 0.352           | 0.593           | -0.546              | 0.035           | 0.129           |
| No Mediation<br>ASD Group  | IIFG - PCC              | 0.071         | 0.754           | 0.955           | -0.061             | 0.789           | 0.955           | 0.099               | 0.660           | 0.955           |
|                            | rIFS - PCC              | 0.085         | 0.706           | 0.955           | 0.016              | 0.942           | 0.972           | 0.112               | 0.619           | 0.929           |
|                            | lPrec/PCC - rLG         | -0.048        | 0.831           | 0.955           | 0.093              | 0.680           | 0.955           | -0.025              | 0.913           | 0.967           |
|                            | lPrec/PCC - IMOG        | 0.027         | 0.904           | 0.967           | 0.013              | 0.954           | 0.972           | 0.048               | 0.832           | 0.955           |
|                            | lPrec/PCC - ILG         | 0.031         | 0.890           | 0.967           | 0.201              | 0.369           | 0.594           | 0.041               | 0.858           | 0.965           |
|                            | lPrec/PCC - rMOG        | 0.007         | 0.974           | 0.974           | -0.060             | 0.789           | 0.955           | 0.076               | 0.738           | 0.955           |
| TD Group                   | IIFG - PCC              | -0.054        | 0.753           | 0.955           | -0.129             | 0.452           | 0.697           | -0.043              | 0.804           | 0.955           |
|                            | rIFS - PCC              | -0.351        | 0.036           | 0.129           | <b>-0.550</b>      | <b>0.001</b>    | <b>0.009</b>    | -0.309              | 0.067           | 0.212           |
|                            | lPrec/PCC - rLG         | -0.303        | 0.072           | 0.212           | -0.260             | 0.126           | 0.296           | -0.267              | 0.115           | 0.282           |
|                            | <b>lPrec/PCC - IMOG</b> | <b>-0.557</b> | <b>0.000</b>    | <b>0.009</b>    | -0.300             | 0.075           | 0.212           | <b>-0.593</b>       | <b>0.000</b>    | <b>0.008</b>    |
|                            | <i>lPrec/PCC - ILG</i>  | <i>-0.392</i> | <i>0.018</i>    | <i>0.092</i>    | <i>-0.383</i>      | <i>0.021</i>    | <i>0.095</i>    | <i>-0.437</i>       | <i>0.008</i>    | <i>0.067</i>    |
|                            | lPrec/PCC - rMOG        | -0.272        | 0.109           | 0.279           | -0.179             | 0.295           | 0.549           | -0.297              | 0.079           | 0.212           |

Behavioral correlations between language scores and iFC results are shown for each of the three groups: ASD participants that show PCC-mediated iFC between frontal language region and visual cortex, ASD participants that do show a mediation effect, and TD participants. The results were corrected for effects of age and in-scanner head motion. The significance of each Pearson correlations is shown in uncorrected *p*-values and FDR-adjusted *q*-values. Results that survived FDR correction with *q*<0.05 are bolded. Results that are marginally significant after FDR correction (*q*<0.10) are italicized.

**Supplementary Table 6. Between group differences in language network iFC across preprocessing pipelines**

| Pipeline    | ROI Pairs        | Between Group Comparisons |                 |                 |
|-------------|------------------|---------------------------|-----------------|-----------------|
|             |                  | <i>t</i> -value           | <i>p</i> -value | <i>q</i> -value |
| Without GSR | IIFG-IPrec/PCC   | 2.330                     | 0.022           | 0.263           |
|             | IIFG-IAG         | 2.247                     | 0.027           | 0.263           |
|             | bdPrec-lSMarG    | 2.407                     | 0.018           | 0.263           |
|             | rIFS-rIPL        | 2.278                     | 0.025           | 0.263           |
|             | rIFS-IPrec/PCC   | 2.660                     | 0.009           | 0.263           |
|             | rIFS-IAG         | 2.429                     | 0.017           | 0.263           |
|             | rIPL-IPC         | 2.320                     | 0.022           | 0.263           |
| With GSR    | IIFG-rHG         | -2.372                    | 0.020           | 0.306           |
|             | bdPrec-bSMA      | 2.204                     | 0.030           | 0.306           |
|             | bdPrec-rInsula   | 2.762                     | 0.007           | 0.306           |
|             | bdPrec-IPrec/PCC | -2.374                    | 0.020           | 0.306           |
|             | bdPrec-lSMarG    | 2.154                     | 0.034           | 0.306           |
|             | rIPL-rSTS        | 2.663                     | 0.009           | 0.306           |
|             | IPrec/PCC-IAG    | -2.173                    | 0.032           | 0.306           |

Between group differences for within language network iFC analysis. Separate preprocessing pipelines with and without global signal regression (GSR). IIFG: left inferior frontal gyrus; IPC: left pericentral region; IPrec/PCC: left precuneus/posterior cingulate cortex; IAG: left angular gyrus; lSMarG: left supramarginal gyrus; bdPrec: bilateral dorsal precuneus; rIFS: right inferior frontal sulcus; rIPL: right inferior parietal lobule.

**Supplementary Table 7. Significant between-group clusters from whole-brain iFC analysis across preprocessing pipelines**

| Seed      | Pipeline    | Significant clusters<br>Anatomical location                                  | Directionality                 | Cluster-<br>Wise $\alpha$  | Voxels          | CM x           | CM y             | CM z           |
|-----------|-------------|------------------------------------------------------------------------------|--------------------------------|----------------------------|-----------------|----------------|------------------|----------------|
| IIFG      | Without GSR | <b>Bilateral posterior cingulate cortex</b>                                  | <b>ASD &gt; TD</b>             | <b>&lt; 0.03</b>           | <b>35</b>       | <b>-4</b>      | <b>-51</b>       | <b>35</b>      |
|           | With GSR    | [Bilateral posterior cingulate cortex]                                       | ASD > TD                       | > 0.10                     | 58              | -1             | -51              | 37             |
| rIFS      | Without GSR | <b>Bilateral posterior cingulate cortex</b>                                  | <b>ASD &gt; TD</b>             | <b>&lt; 0.01</b>           | <b>68</b>       | <b>0</b>       | <b>-38</b>       | <b>32</b>      |
|           |             | <b>Bilateral posterior cingulate cortex</b>                                  | <b>ASD &gt; TD</b>             | <b>&lt; 0.03</b>           | <b>33</b>       | <b>-3</b>      | <b>-55</b>       | <b>14</b>      |
|           | With GSR    | [Right posterior cingulate cortex]                                           | ASD > TD                       | > 0.10                     | 37              | 0              | -40              | 32             |
| IPrec/PCC | Without GSR | <b>Right lingual gyrus</b>                                                   | <b>ASD &gt; TD</b>             | <b>&lt; 0.01</b>           | <b>280</b>      | <b>15</b>      | <b>-71</b>       | <b>0</b>       |
|           |             | <b>Left middle occipital gyrus</b>                                           | <b>ASD &gt; TD</b>             | <b>&lt; 0.01</b>           | <b>73</b>       | <b>-27</b>     | <b>-84</b>       | <b>24</b>      |
|           |             | <b>Left lingual gyrus</b>                                                    | <b>ASD &gt; TD</b>             | <b>&lt; 0.01</b>           | <b>54</b>       | <b>-18</b>     | <b>-70</b>       | <b>-10</b>     |
|           |             | <b>Right middle occipital gyrus</b>                                          | <b>ASD &gt; TD</b>             | <b>&lt; 0.04</b>           | <b>29</b>       | <b>32</b>      | <b>-78</b>       | <b>27</b>      |
|           | With GSR    | <b>Bilateral posterior cingulate cortex</b>                                  | <b>TD &gt; ASD</b>             | <b>&lt; 0.01</b>           | <b>67</b>       | <b>3</b>       | <b>-51</b>       | <b>30</b>      |
|           |             | <b>Bilateral anterior cingulate cortex</b><br>[Right middle occipital gyrus] | <b>TD &gt; ASD</b><br>ASD > TD | <b>&lt; 0.01</b><br>> 0.01 | <b>46</b><br>52 | <b>5</b><br>32 | <b>55</b><br>-80 | <b>0</b><br>26 |

Between group differences for whole-brain iFC analyses across two preprocessing pipelines with and without global signal regression (GSR). IIFG: left inferior frontal gyrus; IPrec/PCC: left precuneus/posterior cingulate cortex; rIFS: right inferior frontal sulcus. Directionality of between groups differences in connectivity with seeds show mostly ASD > TD clusters. All results were cluster-corrected for multiple comparisons using AFNI's 3dttest++ -ClustSim permutation tests with bolded results surviving a voxel-level  $p$ -threshold of 0.001 and non-bolded results surviving a voxel-level  $p$ -threshold of 0.01; individual cluster-wise  $\alpha$  are listed separately. Locations in square brackets indicate clusters with an uncorrected  $p < 0.01$  that did not survive cluster correction. Coordinates reflect center of mass (CM) of resulting cluster in MNI space.
